# Supplementary material for: Barriers from Multiple Perspectives Towards Physical Activity, Sedentary Behaviour, Physical Activity and Dietary Habits When Living in Low Socio-Economic Areas in Europe. The Feel4Diabetes Study
Source: Int J Environ Res Public Health. 2018 Dec 13;15(12):2840. doi: 10.3390/ijerph15122840 (PMC6313803; doi:10.3390/ijerph15122840)
Supplement: Supplementary file 1 [file ijerph-15-02840-s001.zip › ijerph-379416-R1 Supplementary_B.xlsx]

## Sheet: Blad1
	A. Physical activity			B. Limiting sedentary behaviour				C. Healthy dietary habits
	Parents		Teachers & local community workers	Parents		Teachers & local community workers		Parents		Teachers & local community workers
	General	Country-specific	Additional barriers	General	Country-specific	Additional barriers		General	Country-specific	Additional barriers
Individual	Lack of energy/feeling tired	Laziness (Hungary, Finland)	Lack of motor skills (T, LCW)	Need to relax/rest	Health problems (Greece)	Lack of knowledge (LCW)		Unhealthy family traditions	Lack of energy/feeling tired (Greece)	Lack of cooking skills (LCW)
	Health problems		Lack of knowledge (T, LCW)	Unhealthy family traditions	Preferring sedentary activities (Belgium, Bulgaria)	Misperception regarding SB (T)		Disliking healthy foods	Boredom (Greece)	Lack of knowledge (LCW, T)
	Lack of motivation		Misperception regarding transport to school (T)		Addiction to technology (Finland, Greece)			Unhealthy dietary preferences	Health problems (Greece)
			Lack of parental skills (LCW)					Healthy cooking being time-consuming	Lack of parental skills (Greece, Hungary)
Interpersonal									Lack of parental self-efficacy (Belgium, Greece)
	Lack of time	Religion and lack of acculturation (Belgium)	Absence of a role model (LCW)		Lack of time (Greece)	Bad role models (LCW)		Bad role models	Unhealthy cultural habits (Belgium)	Wanting to render luxury and wealth (LCW)
	Financial limitations	No caregiver/supervisor for the children (Finland, Greece)	Wanting to render luxury and wealth (LCW)			Wanting to render luxury and wealth (LCW)			Reward (Greece)
		Organizational difficulties (Spain, Bulgaria)							Availability of unhealthy foods/drinks (Greece, Hungary)
Organizational	Lack of public facilities in the neighbourhood	Fully booked sports clubs (Belgium)	Unsafe and/or inappropriate playgrounds at school (T)	Homework and/or other educational sedentary tasks	Inappropriate work environment (Bulgaria)	Inappropriate school (classroom) environment (T)			Long distance to healthy food facilities (Greece)	Low school budget (T)
	Unsafe, old and/or unmaintained public facilities	Lack of (sports) facilities and space in school (Bulgaria)	Absence of extra-curricular school-based activities (T)		Sedentary education system (Bulgaria, Hungary)				Unhealthy school policy (Bulgaria, Greece)
	Lack of facilities and space at home	Small offer of group activities in sports clubs (Finland)
	Uncomfortable and/or inflexible sports clubs circumstances	Long distance to school (Finland)
		Closed (public or sports) facilities (Greece)
		Lack of advertisement on organized activities (Greece)
		High-threshold sports clubs (Greece)
		Badly organized (sports) activities (Greece)
		Lack of sports clubs (Greece)
		Too crowded public facilities (Spain)
		Unhealthy school policy (Bulgaria, Spain)
		Lack of organized (family) activities (Finland, Greece)
Macro		Unfavourable weather circumstances (Finland)		Unfavourable weather circumstances		Negative influence of media and advertisements (LCW)			Negative influence of media and advertisements (Finland)
		Bad economic situation of the country (Greece)		Technology nation					Seasonal factors (Greece)
									Bad economic situation of the country (Greece)
									High cost of healthy foods (Greece, Spain)
