# Supplementary material for: Barriers from Multiple Perspectives Towards Physical Activity, Sedentary Behaviour, Physical Activity and Dietary Habits When Living in Low Socio-Economic Areas in Europe. The Feel4Diabetes Study
Source: Int J Environ Res Public Health. 2018 Dec 13;15(12):2840. doi: 10.3390/ijerph15122840 (PMC6313803; doi:10.3390/ijerph15122840)
Supplement: Supplementary file 1 [file ijerph-15-02840-s001.zip › ijerph-379416-R1 Supplementary_C.xlsx]

## Sheet: Blad1
			Belgium	Finland	Greece	Spain	Bulgaria	Hungary
P = parents, T = teachers, LCW = local community workers
A. PHYSICAL ACTIVITY
PHYSICAL ACTIVITY	Individual	Lack of knowledge	LCW	T		LCW & T	LCW
		Lack of motivation	T	LCW & P	LCW & P	P	P
		Laziness		P				P
		Misperception		T
		Lack of energy / feeling tired	P	P	LCW & P	P		P
		Health problems	P		P	P		P
		Lack of interest / not liking PA		P & LCW	P	P & T
		Not a priority	T	P	T & P	P & T
		Lack of motor skills	LCW			T
		Lack of parental skills	LCW
	Interpersonal	Lack of time	LCW & P	LCW & P	T & P	P	LCW & P	P
		Financial limitations	T	LCW & P	P & LCW	T & LCW & P	LCW	P
		No caregiver/supervisor for the children		T & P	P	T
		Religion and lack of acculturation	P & LCW			T
		Lack of social support	P	P	P
		Organizational difficulties	LCW			P	P
		Wanting to render luxury and wealth	LCW
		Absence of a role model						LCW
	Organizational	School / work
		Unhealthy school policy			T	P	P
		Unsafe and/or unappropriate playgrounds		T	T		T
		Lack of (sports) facilities and space in school		T			P & T
		Absence of active extra-curricular school-based activities		T
		Long distance to school/work		P & T			T
		Environmental / neighborhood
		Closed facilities			P & T & LCW
		Lack of public facilities	P	P	LCW	P	LCW & P	LCW
		Long distance to facilities	P	P	P
		Too crowded public facilities				P
		Unsafe, old and/or unmaintained public facilities	P & LCW		P		P & LCW	P
		Sports club / organized activities
		Lack of advertisement on organized activities	T & LCW	LCW	P & LCW
		Fully booked sports clubs	P
		Sports clubs being too expensive	T & LCW	P & T	P	P & T & LCW
		Limited opportunity for group activities in sports clubs		P
		Lack of sports clubs	LCW		P		LCW
		Lack of organized (family) activities		P	P
		High-threshold sports clubs	T	T & LCW	P
		Uncomfortable and/or inflexible sports clubs cirumstances	P & LCW	P	P			P
		Badly organized (sports) activities			P
		Home
		Lack of facilities and space at home	P	P	P		P
	Macro	Unsafe neighbourhood		T & P	P		T & P
		Bad economic situation of the country			T & LCW & P
		Unfavourable weather circumstances		P			T
B. LIMITING SEDENTARY BEHAVIOUR
SEDENTARY BEHAVIOUR	Individual	Lack of knowledge				LCW	LCW
		Miscperception regarding SB		T
		Need to relax/rest	P	P & LCW	LCW & P	P & LCW
		Unhealthy family traditions	P		P	P	P	P
		Preferring sedentary activities	P				P
		Addiction to technology	LCW	P	P
		Health problems			P
		Boredom	P		P	P
		Lack of parental skills	LCW	P	P		P
	Interpersonal	No caregiver or supervisor for the children		P	P	P
		Lack of time		T	P
		Bad role models		LCW		LCW
		Wanting to render luxury and wealth	LCW
	Organizational	School / work
		Sedentary education system	T	T	T	T	P	P
		Sedentary jobs	LCW	LCW & P	LCW & P		P
		Homework and/or other educational sedentary tasks		P	P & T	P	P
		Inappropriate school (classroom) environment	T			T
		Inappropriate work environment					P
	Macro	Unfavourable weather circumstances	T & P	p	P	P	P	P
		Technology nation	P & LCW	P & LCW	P	P	P	P
		Negative influence of media and advertisements	LCW
C. HEALTHY DIETARY HABITS
DIETARY HABITS	Individual	Disliking healthy foods	P & T	T	P	P	P	P
		Unhealthy family traditions	T & LCW & P	T & P	P & T	P	P & LCW	LCW & P & T
		Unhealthy dietary preferences	P & T & LCW	P	P	P	P
		Lack of knowledge	LCW	LCW	T	LCW	LCW
		Lack of parental skills			P	LCW		P
		Lack of parental self-efficiacy	P		P
		Lack of energy / feeling tired			P		LCW
		Healthy cooking being time-consuming	P & LCW	P	P & T	P & T & LCW
		Boredom			P
		Addicted to unhealthy foods or beverages	LCW	P	P	P
		Health problems		LCW	P
		Lack of cooking skills	LCW
	Interpersonal	Bad role models	T	P	T & P & LCW	P	P	P
		Financial limitations	LCW	LCW	LCW & P & T	LCW & P		P
		Unhealthy cultural habits	P & LCW		LCW	T & LCW
		Reward			P
		Availability of unhealthy foods/drinks			P			P
		Wanting to render luxury and wealth	LCW	LCW				LCW
	Organizational	Long distance to healthy food facilities			P
		Low school budget for healthy food at school		T
		Unhealthy school policy	T	T	T & P	T	T & P
	Macro	Seasonal factors			P
		High cost of healthy foods	LCW	LCW	P	P & LCW
		Negative influence of media and advertisements		P	LCW
		Bad economic situation of the country		T	LCW & T & P	LCW
